# Supplementary material for: Multidisciplinary Views on Applying Explicit and Implicit Motor Learning in Practice: An International Survey
Source: PubMed Central journal article supplement (PMC4546413; doi:10.1371/journal.pone.0135522), 2015-08-21
Supplement: pone.0135522.s001.pdf [file pone.0135522.s001.pdf]

Supporting Information 1: Recruitment and compilation of experts.

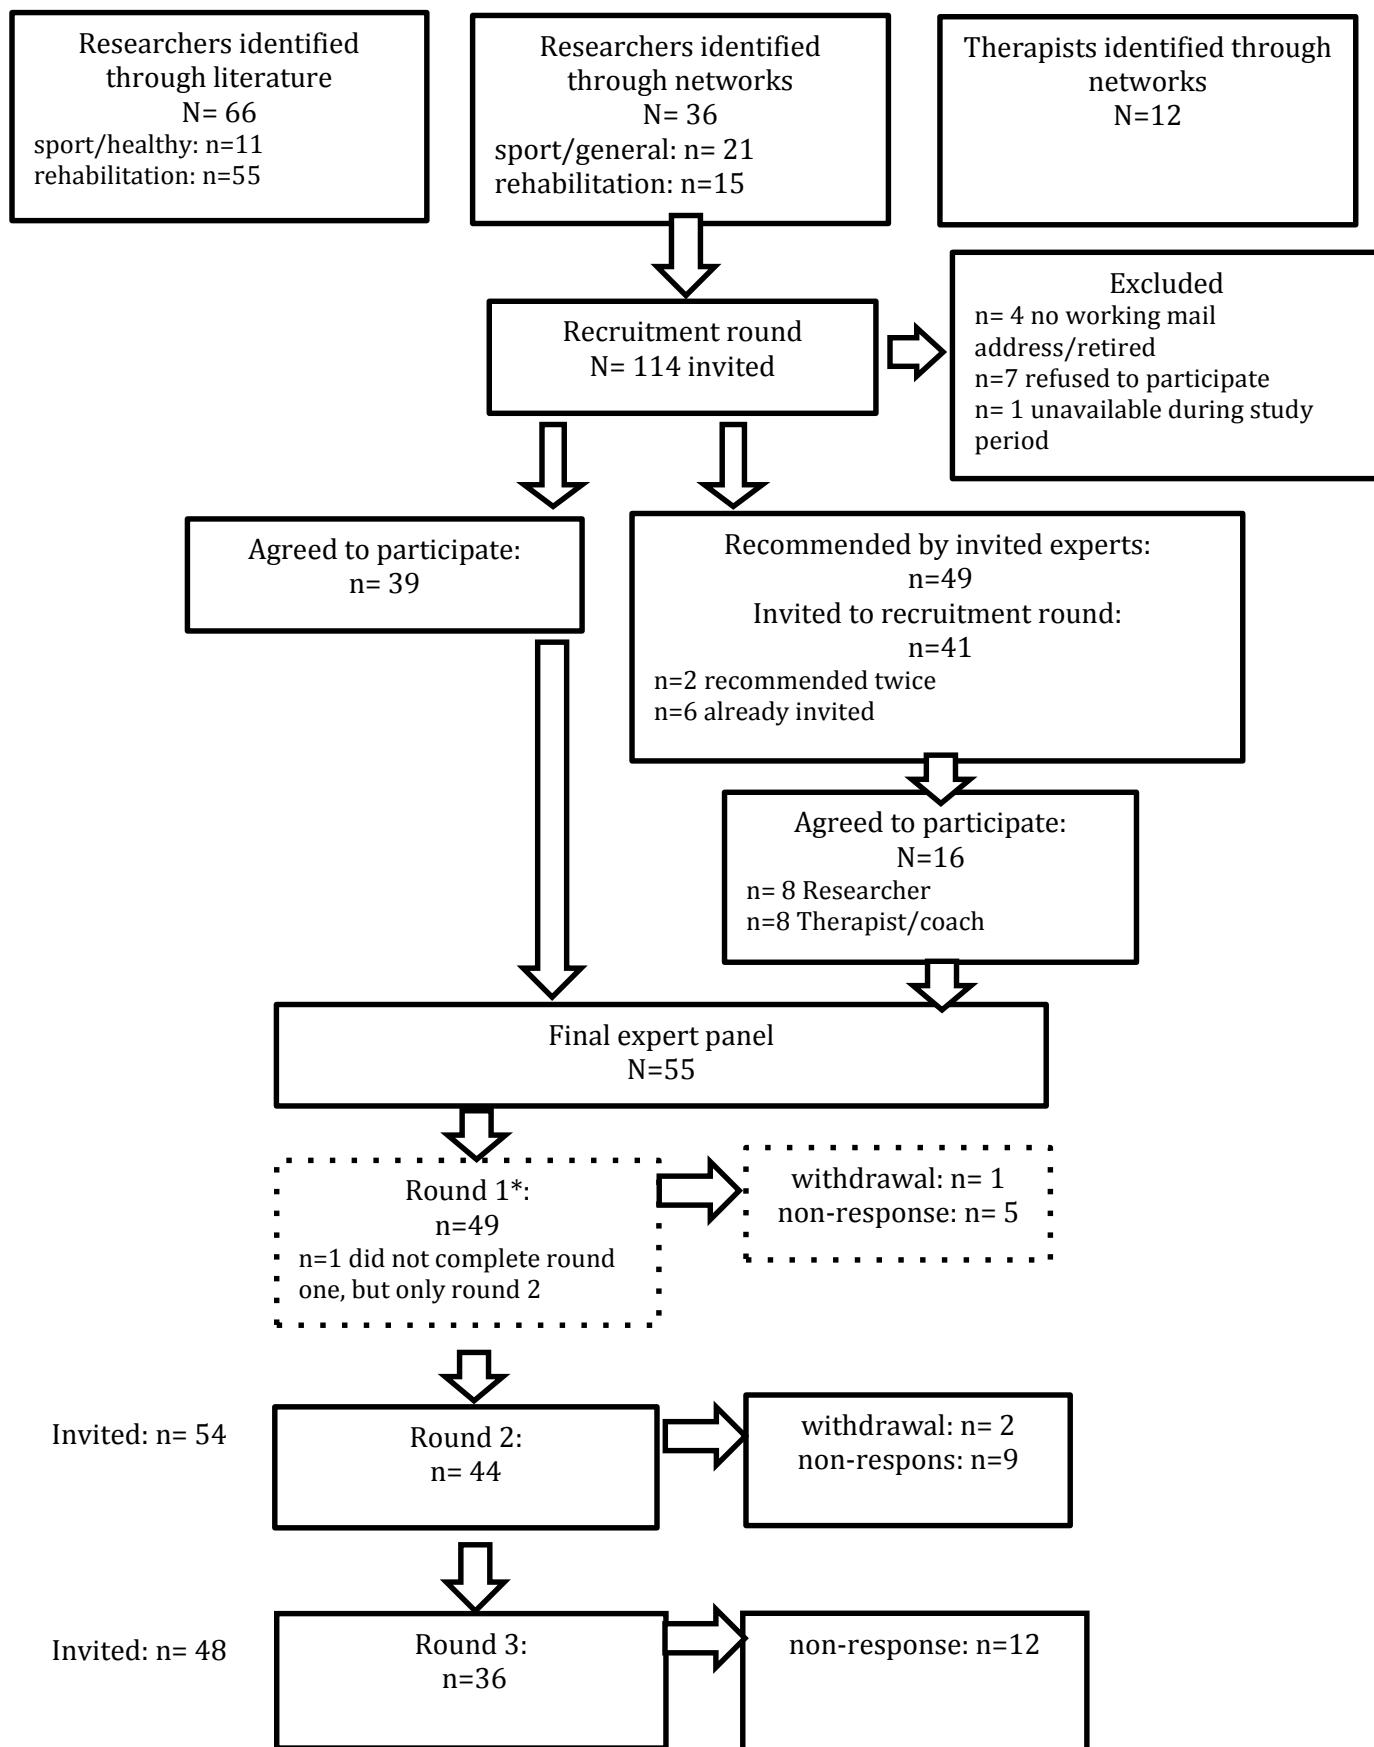

\*Boxes of Round 1 are dashed as results of this round are not taken into account in this article
