# Supplementary material for: Multidisciplinary Views on Applying Explicit and Implicit Motor Learning in Practice: An International Survey
Source: PubMed Central journal article supplement (PMC4546413; doi:10.1371/journal.pone.0135522), 2015-08-21
Supplement: pone.0135522.s002.pdf [file pone.0135522.s002.pdf]

Supporting Information 2: Questions asked within the survey

| Element                   | Question                                                                 | Answering method              | Answering options                                                                                                                                                                                                                                                                                                                                                          |
|---------------------------|--------------------------------------------------------------------------|-------------------------------|----------------------------------------------------------------------------------------------------------------------------------------------------------------------------------------------------------------------------------------------------------------------------------------------------------------------------------------------------------------------------|
| <b>Instructions</b>       | Should any specific instructions be given to the learner about the task? | Open comment box              | -                                                                                                                                                                                                                                                                                                                                                                          |
| <b>Focus of attention</b> | Should the learner be instructed to focus on:                            | Multiple choice; one option   | <ul style="list-style-type: none"> <li>• Internal cues (internal focus of attention)</li> <li>• External cues (external focus of attention)</li> <li>• Not applicable</li> <li>• I cannot state as it depends on (open comment possible)</li> </ul>                                                                                                                        |
| <b>Manual guidance</b>    | Should manual guidance be used?                                          | Multiple choice; one option   | <ul style="list-style-type: none"> <li>• No</li> <li>• Little</li> <li>• Some</li> <li>• Much</li> <li>• Not applicable</li> <li>• I cannot state as it depends on (open comment possible)</li> </ul>                                                                                                                                                                      |
| <b>Feedback (content)</b> | Which forms of feedback should the learner receive?                      | Multiple choice; more options | <ul style="list-style-type: none"> <li>• Feedback on the performance</li> <li>• Feedback on the results</li> <li>• Addressing the aspects of the performed skill which are good;</li> <li>• Addressing the aspects of the performed skill which should be improved</li> <li>• Not applicable</li> <li>• I cannot state as it depends on (open comment possible)</li> </ul> |
| <b>Feedback (timing)</b>  | When should the feedback be given?                                       | Multiple choice; more options | <ul style="list-style-type: none"> <li>• During the movement</li> <li>• After the movement</li> <li>• Immediately after the relevant action</li> <li>• Delayed after the relevant action</li> </ul>                                                                                                                                                                        |

*Note: Questions were asked separately for implicit and explicit motor learning*
